# Supplementary material for: Anticandidal Potential of Two Cyanobacteria-Synthesized Silver Nanoparticles: Effects on Growth, Cell Morphology, and Key Virulence Attributes of Candida albicans
Source: MDPI journal article supplement (doi:10.3390/pharmaceutics13101688), 2021-10-15
Supplement: s1 [file s1]

# Supplementary Materials: Anticandidal Potential of Two Cyanobacteria-Synthesized Silver Nanoparticles: Effects on Growth, Cell Morphology, and Key Virulence Attributes of *Candida albicans*

Reham Samir Hamida, Mohamed Abdelaal Ali, Doaa A. Goda and Alya Redhwan

**Table S1.** Number and intensity of bands in the protein profiles of *C. albicans* treated or not with 1.5 mg/mL AgNO<sub>3</sub>, N-SNPs, and D-SNPs.

| Control  |       |          | AgNO <sub>3</sub> |       |          | D-SNPs   |       |          | N-SNPs   |       |          |
|----------|-------|----------|-------------------|-------|----------|----------|-------|----------|----------|-------|----------|
| Band No. | Lane% | MW (kDa) | Band No.          | Lane% | MW (kDa) | Band No. | Lane% | MW (kDa) | Band No. | Lane% | MW (kDa) |
| 1        | 0.82  | 122.884  | 1                 | 1.93  | 136.418  | 1        | 1.08  | 87.891   | 1        | 2.16  | 136.418  |
| 2        | 1.35  | 73.210   | 2                 | 1.83  | 64.003   | 2        | 0.67  | 62.713   | 2        | 1.67  | 80.000   |
| 3        | 1.44  | 52.290   | 3                 | 14.19 | 55.070   | 3        | 1.43  | 58.063   | 3        | 3.33  | 61.001   |
| 4        | 1.82  | 46.438   | 4                 | 1.89  | 39.284   | 4        | 3.82  | 58.039   | 4        | 1.4   | 45.546   |
| 5        | 1.66  | 35.992   | 5                 | 1.59  | 28.242   | 5        | 1.29  | 58.039   | 5        | 0.7   | 39.284   |
| 6        | 1.13  | 29.338   | 6                 | 1.04  | 26.270   | 6        | 0.96  | 56.840   | 6        | 9.84  | 28.755   |
| 7        | 1.64  | 27.389   | 7                 | 2.83  | 24.498   | 7        | 0.62  | 47.534   | 7        | 7.9   | 26.132   |
|          |       |          | 8                 | 1.24  | 21.001   | 8        | 0.65  | 37.726   | 8        | 3.21  | 24.498   |
|          |       |          | 9                 | 14.73 | 16.059   | 9        | 0.93  | 35.658   | 9        | 1.96  | 21.001   |
|          |       |          | 10                | 4.59  | 16.059   | 10       | 1.09  | 25.237   | 10       | 1.47  | 15.588   |
|          |       |          |                   |       |          | 11       | 3.09  | 23.056   |          |       |          |
|          |       |          |                   |       |          | 12       | 1.33  | 23.056   |          |       |          |
|          |       |          |                   |       |          | 13       | 2.20  | 19.451   |          |       |          |
|          |       |          |                   |       |          | 14       | 1.57  | 17.584   |          |       |          |
|          |       |          |                   |       |          | 15       | 7.86  | 16.781   |          |       |          |
